# Supplementary material
Source: PubMed Central journal article supplement (PMC3464012)
Supplement: NIHMS404191-supplement-1.pdf [file NIHMS404191-supplement-1.pdf]

**SUPPLEMENTARY MATERIALS.****Supplementary methods.****MCAM.**

*MCA*: Selective enrichment of methylated DNA in each sample DNA was conducted by utilizing the MCA methodology. In MCA, the methylated DNA-specific amplification was carried out based upon the serial digestion with a set of isoschizomers, methylation-sensitive *Sma*I and methylation-insensitive *Xma*I, followed by *Xma*I-digested fragment-specific linker PCR. In brief, 5 µg of DNA was digested with *Sma*I and then dephosphorylated using Antarctic phosphatase. DNA was subsequently subjected to digestion with *Xma*I followed by column-purification with the QIAquick PCR purification kit (Qiagen). The purified DNA was then ligated to a linker by using T4 DNA ligase and column-purified again. The linker was prepared by annealing the following two oligomers: RMCA24 (5'-CCACCGCCATCCGAGCCTTTCTGC-3') and RMCA12 (5'-CCGGGCAGAAAG-3'). One hundred ng of linker-ligated DNA was PCR-amplified in a 100µl reaction mix containing 100 pM of RMCA24 as described previously (Estecio, et al. 2007).

*Microarray*: The 244K Human CpG Island microarray (Agilent Technologies, Santa Clara, CA) was used as the array platform. The hybridization targets were prepared by labeling 5 µg of MCA-processed DNA with Cy-5 or Cy-3 dUTP using the random primer method (BioPrime DNA Labeling System, Invitrogen, Carlsbad, CA). Array hybridization and washing was carried out according to the Agilent CGH microarray protocol. Array raw data acquisition was conducted using an Agilent G2565BA microarray scanner and Feature Extraction Software (Agilent) according to the array-CGH data extraction protocol.

*Array data processing*: Raw data processing included background subtraction and LOESS normalization using the LIMMA scripts (Wettenhall and Smyth 2004). LOESS normalization was performed based on the probes whose corresponding *Sma*I-*Xma*I fragment length were greater than 5kb and thus were not susceptible to PCR-amplification

regardless of the methylation status, as was described previously (Estecio et al. 2007). The normalized log<sub>2</sub> intensity ratio to the fully methylated control DNA, CpGenome Universal Methylated DNA (Millipore, Billerica, MA), at each locus was used as the value representing the locus methylation status. When multiple probes corresponded to a SmaI-XmaI fragment, the median of these probes were used as the representative value. The data for probes whose corresponding SmaI-XmaI fragments were 60-2000 nucleotides in length (*i.e.*, optimal size for PCR amplification) were used for the evaluation of loci methylation status (Estecio et al. 2007). Fragments were dropped from analyses when only single corresponding probe presented on the array and the raw signal intensity for this probe was low (*i.e.*, <500 AU) in fully methylated control DNA, as described previously (Estecio et al. 2007). As the results, this MCAM protocol enabled the methylation status assessment of 34,396 SmaI-XmaI restriction fragments that corresponded to 14,213 CGIs (50.4% of all CGIs in the genome). Twenty percent of these SmaI-XmaI fragments located outside of known coding or non-coding genes, and the remaining fragments located proximal to the transcriptional start sites (-2,000 to +500 bases, 63%) or transcribed regions (17%). Annotation of the probes and SmaI-XmaI fragments was based upon the Human Genome Assembly version 18. Array raw data processing was conducted using a LIMMA library-based R script and a sql script.

### **Legends for Supplementary figure.**

#### **Supplementary Figure 1. MCAM data reproducibility and reliability**

**A.** The raw data for two experimental batches of a specimen demonstrated extremely high correlation ( $R > 0.99$ ). Each datapoint represents a probe. The MCAM experiment for these two batches (*i.e.*, DNA processing, array hybridization, and array scanning) was performed on separate days, two weeks apart. **B.** Methylation measurements by MCAM (*X-axis*) and qMSP (*Y-axis*) are plotted for individual specimens at four loci. The results from MCAM and qMSP assays at these loci correlated well ( $R > 0.70$ ,  $p < .0001$ ) despite of the markedly distinctive basis of methylation measurement for MCAM vs. qMSP (*e.g.*, restriction enzyme digestion vs. bisulfite conversion, single CpG methylation status vs. continuous methylation of all or nearly all CpGs within a region that is 70-120 bases in length).

**Supplementary Figure 2. Cluster analysis of the methylation microarray data.**

The k-mean Clustergram is shown for the analysis of 18,892 autosomal loci that tended to be differentially methylated between 17 CRCs and 8 control NCs (inclusion criteria: t-test  $p < .1$ ). *Y-axis* represents loci alignment, while *x-axis* represents tissue alignment: *orange*, control NCs; *pink*, CIMP(+) CRCs; *blue*, CIMP(-) CRCs. As is expected, control NCs clustered separately from CRCs, and CIMP(-) CRCs formed a cluster separately from most CIMP(+) CRCs. *Gray vertical bars* indicate the clusters of loci whose methylation status in CIMP(+) CRCs differs from that of CIMP(-) CRCs.

**Supplementary Figure 3. ALX3 methylation status for non-neoplastic colonic tissues from CRC cases as well as neoplasia-free control cases.**

Median (*bar*), 25-75 percentile range (*box*), and 10-90 percentile range (*whisker*) of all informative specimens are displayed for each tissue category. P-values were calculated by Mann-Whitney test.

| Target        | Forward primer sequence (5'>3') | Reverse primer sequence (5'>3') | TaqMan probe sequence (5'>3')   |
|---------------|---------------------------------|---------------------------------|---------------------------------|
| <b>ALX3</b>   | GTTCGGGTTAGCGTTAATTCGGTTTTC     | CTTCCTACTTATCTCTCCCGCTCG        | AAGTCGTGGCGAAAGGCGAGAG          |
| <b>CCDC4</b>  | TTTTGCGTTTGAATTGTTGCGGC         | CCTAATAAAACTACCGCACGTACGAACG    | TTCGTTGTTGTTGATGGAGACGGCG       |
| <b>CHX10</b>  | AAAATTTTCGGATTCGGGTTTCGGC       | CAAAAAACCTACGAACGCCCG           | ACCGTCCCATCCCTAAACTCAAATAACC    |
| <b>DOCK8</b>  | GGTTTCGGGTAGAGCGCGTC            | TAACGCGCAAACAACGACGAACG         | AGTATCGGGAGGTTAGTTTCGCGTTGG     |
| <b>GJA7</b>   | TTCGGGTAGTTGTCGGTATCGTC         | CGCGAAAATATCGAACGACGATCG        | AAACGACGCGCACTCGACGAC           |
| <b>GLP1R</b>  | AGTTCGGGATTAGTTTTTCGTACGC       | AACCGAAAACGCCGACCATAACG         | TCGTAGGTGGTAGCGATGGTTTTAGTTTTGA |
| <b>HOMER2</b> | GGAAGGGTTACGGGTTTCGC            | CGAAAATCTAAAACCACCTAACCCGCG     | TTTGTTGGGTGTTTCGCGTGTTCGG       |
| <b>BTG4</b>   | ATTCGTTTCGTTTCGCGTTCGTTTC       | CGGGAGGGTTTTGAGAGGAGC           | AACGACCAACCGTCCTTAAAACCC        |
| <b>miR34b</b> | CGCTCTAAACGACCGAATAACTATAACG    | CTCCCAAACCGAAAACCGCG            | TACCAAACCTCCCCTTCCCGCAAC        |
| <b>NME4</b>   | GTTTCGGGTTGGTATCGTTTTTCGC       | CGCCAAAAAAAACCGCCATAACG         | TTTCGCGTTTATAGCGTTTCGCGG        |
| <b>NPTX1</b>  | AGTTTTTCGAGCGTTCGTCGTTTGC       | TCTAACGCCAAAAAACGACGACCG        | TGAGTCGGGGTTGCGTTTTTCGTTG       |
| <b>TMEM42</b> | GTAGGGCGTCGTCGTATTTTCGTC        | TACCACCCCAACTAACCGCAACG         | TTTGTTTCGTCGGGGTTTCGGGTCG       |
| <b>TTLL12</b> | GCGTTTGTGGTTTGGTTGTCGTC         | TCCCGACATTCCCCGAAATCG           | TGCGTACGCGTATTTGATGGTGGTTGA     |
| <b>ZNF583</b> | GATTTGCGGTCGTTTCGGGGTTTTTC      | AACCCTAAAACAAACCGCAAAAACCG      | TTTGCCTCGCGTCGGTTTCGGATTT       |

Supplementary Table 1. Oligonucleotide sequences.

| Locus  | p-value | CRC mean / NC mean | p-value<0.01 and fold change>0.5 | CRC min.> NC max. | Reference                   |
|--------|---------|--------------------|----------------------------------|-------------------|-----------------------------|
| BMP3   | 2E-02   | 0.38               | no                               | no                | (Zou, et al. 2007)          |
| GATA4  | 9E-03   | 0.91               | yes                              | no                | (Hellebrekers, et al. 2009) |
| GATA5  | 5E-05   | 1.04               | yes                              | no                | (Hellebrekers et al. 2009)  |
| HIC1   | 9E-06   | 1.16               | yes                              | no                | (Lenhard, et al. 2005)      |
| HPP1   | 1E-06   | 2.90               | yes                              | no                | (Belshaw, et al. 2004)      |
| ITGA4  | 1E-05   | 0.56               | yes                              | no                | (Ausch, et al. 2009)        |
| MAL    | 7E-03   | 0.93               | yes                              | no                | (Mori, et al. 2006)         |
| MGMT   | 7E-02   | 0.49               | no                               | no                | (Belshaw et al. 2004)       |
| NDRG4  | 6E-02   | 0.08               | no                               | no                | (Melotte, et al. 2009)      |
| NELL1  | 1E-04   | 1.65               | yes                              | no                | (Mori et al. 2006)          |
| OSMR   | 4E-04   | 1.15               | yes                              | no                | (Kim, et al. 2009)          |
| RASSF2 | 9E-07   | 1.26               | yes                              | no                | (Nagasaka, et al. 2009)     |
| SFRP2  | 1E-12   | 4.10               | yes                              | yes               | (Muller, et al. 2004)       |
| TFPI2  | 2E-07   | 2.98               | yes                              | no                | (Glockner, et al. 2009)     |
| VIM    | 5E-03   | 0.35               | yes                              | no                | (Chen, et al. 2005)         |
| WIF1   | 1E-01   | 0.93               | no                               | no                | (Lee, et al. 2009)          |

APC, SEPT9, and ALX4 loci were not informative in the current MCAM analysis.

**Supplementary Table 2. MCAM-derived methylation profiles of the previously reported CRC methylation markers.**

| Locus                      |                     |               | Microarray (Log2 intensity) |               |        |                | MSP                      |
|----------------------------|---------------------|---------------|-----------------------------|---------------|--------|----------------|--------------------------|
| Nucleotide position (hg18) | Corresponding genes | Location      | CRC: mean (SD)              | NC: mean (SD) | CRC/NC | t-test p-value | Hypermethylation in CRCs |
| chr4:154929653-154930045   | SFRP2               | 5'UTR-Exon1   | 1.37 (1.10)                 | -2.72 (0.35)  | 4.10   | 1E-12          | (+)                      |
| chr14:73777277-73777554    | VSX2                | Intron1       | 1.57 (1.19)                 | -1.77 (0.45)  | 3.34   | 8E-10          | (+)                      |
| chr6:41714264-41714529     | MDFI                | Exon1-Intron1 | 1.89 (0.95)                 | -1.33 (0.37)  | 3.23   | 1E-11          | (+)                      |
| chr4:154930045-154930197   | SFRP2               | 5'UTR-Exon1   | 1.82 (1.14)                 | -1.22 (0.20)  | 3.04   | 1E-09          | (+)                      |
| chr1:110414310-110414409   | ALX3                | Intron1       | 1.58 (1.00)                 | -0.94 (0.12)  | 2.52   | 3E-09          | (+)                      |
| chr17:76066388-76066727    | NPTX1               | 5'UTR         | 1.48 (0.52)                 | -0.39 (0.19)  | 1.87   | 3E-12          | (+)                      |
| chr6:39124527-39124750     | GLP1R               | 5'UTR-Intron1 | 0.79 (0.55)                 | -0.75 (0.24)  | 1.54   | 1E-09          | (+)                      |
| chr3:44878617-44878768     | TMEM42/miR564       | Intron1       | 1.09 (0.18)                 | -0.16 (0.40)  | 1.26   | 6E-12          | (+)                      |
| chr22:37432155-37432530    | GTPBP1              | Intron1       | 0.62 (0.18)                 | -0.51 (0.22)  | 1.13   | 1E-14          | (-)                      |
| chr11:110888513-110888739  | miR34b-BTG4         | 5'UTR         | 0.62 (0.32)                 | -0.42 (0.22)  | 1.04   | 3E-10          | (+)                      |
| chr15:81412032-81412142    | HOMER2              | Intron1       | 0.71 (0.37)                 | -0.28 (0.23)  | 1.00   | 8E-09          | (+)                      |
| chr22:41912965-41913471    | TTLL12              | 5'UTR-Intron1 | 0.31 (0.21)                 | -0.65 (0.21)  | 0.96   | 3E-12          | (+)                      |
| chr11:67985025-67985286    | SAPS3               | Intron1       | 0.55 (0.29)                 | -0.28 (0.13)  | 0.84   | 6E-10          | (-)                      |
| chr1:154988383-154990056   | HDGF                | 5'UTR-Intron1 | 0.45 (0.15)                 | -0.36 (0.17)  | 0.82   | 1E-13          | (-)                      |
| chr19:3012272-3012428      | AES                 | Intron1       | 0.30 (0.19)                 | -0.48 (0.18)  | 0.78   | 1E-11          | (-)                      |
| chr16:387138-387279        | NME4                | 5'UTR-Exon1   | 0.37 (0.21)                 | -0.39 (0.10)  | 0.76   | 5E-12          | (+)                      |
| chr9:204673-204810         | DOCK8               | 5'UTR         | 0.37 (0.23)                 | -0.36 (0.10)  | 0.73   | 8E-11          | (+)                      |
| chr19:61607426-61607563    | ZNF583              | 5'UTR-Exon1   | -0.03 (0.19)                | -0.65 (0.14)  | 0.62   | 4E-10          | (+)                      |
| chr17:40262574-40262867    | GJC1                | Intron1       | 0.32 (0.19)                 | -0.29 (0.11)  | 0.61   | 1E-10          | (+)                      |
| chr4:41848650-41849315     | BEND4               | Intron1-Exon2 | 0.03 (0.13)                 | -0.56 (0.09)  | 0.58   | 2E-13          | (+)                      |

**Supplementary Table 3. Preliminary validation results of the twenty candidate loci for cancer-specific hypermethylation.**

**A**

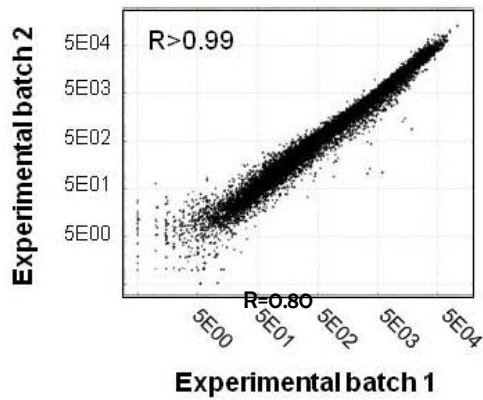

**B**

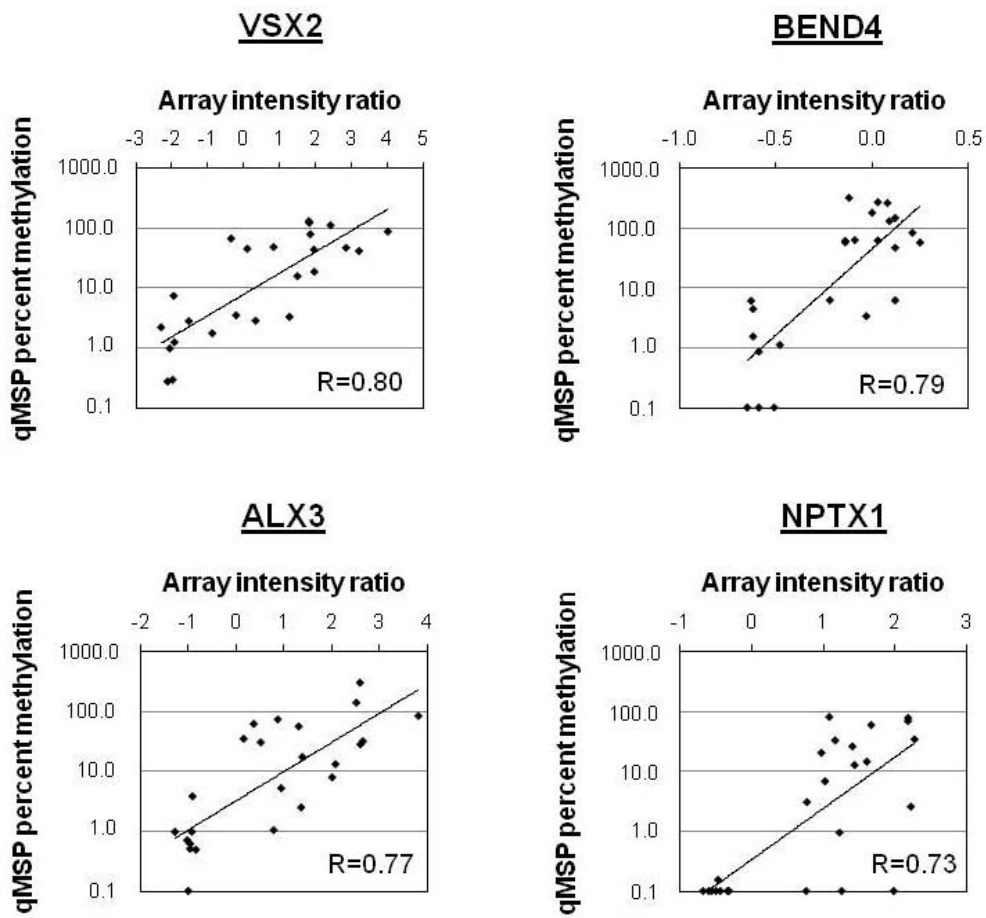

Supplementary Figure 1. MCAM data reproducibility and reliability

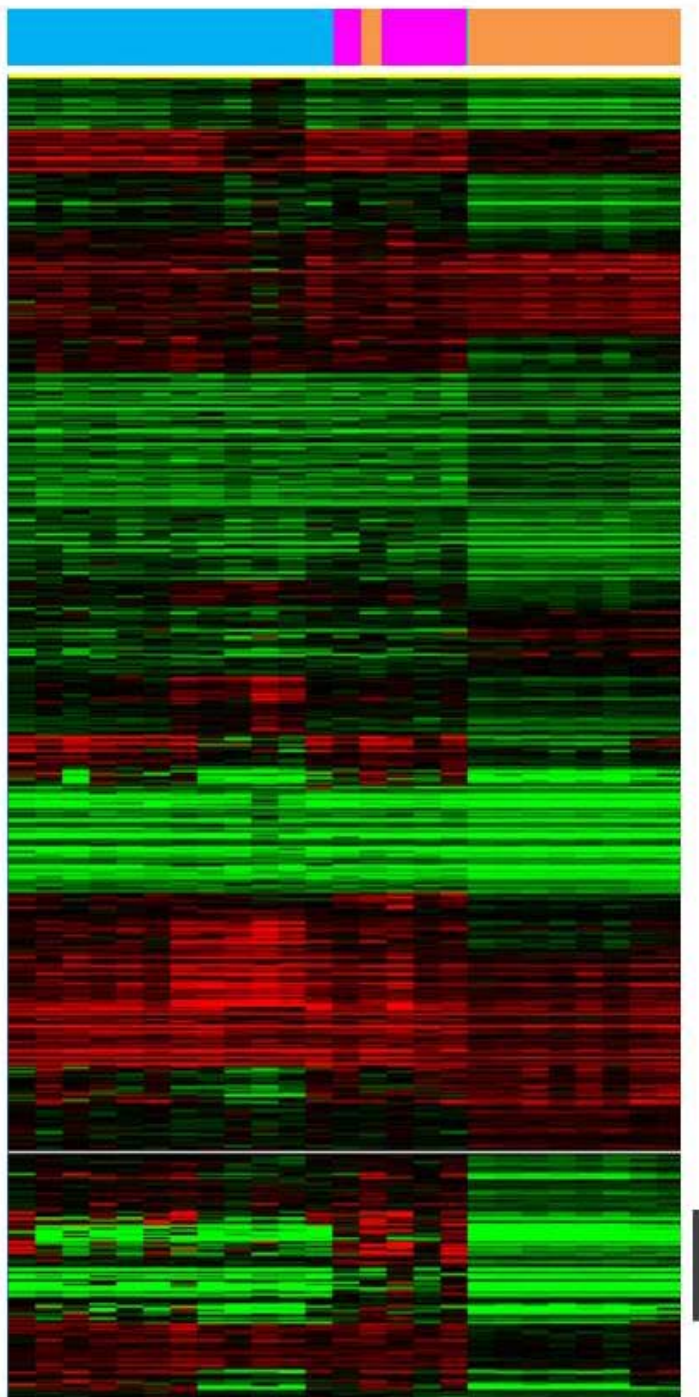

**Supplementary Figure 2. Cluster analysis of the methylation microarray data.**



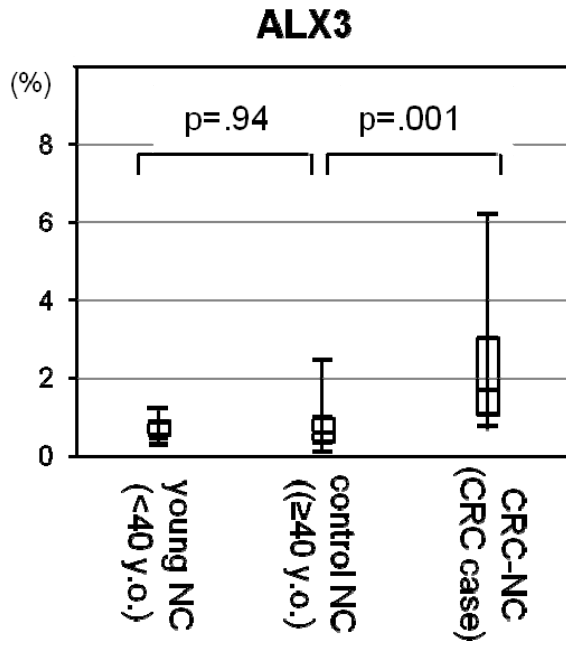

Supplementary Figure 3. *ALX3* methylation status for non-neoplastic colonic tissues from CRC cases as well as neoplasia-free control cases.

## References

- Ausch C, Kim YH, Tsuchiya KD, Dzieciatkowski S, Washington MK, Paraskeva C, Radich J & Grady WM 2009 Comparative analysis of PCR-based biomarker assay methods for colorectal polyp detection from fecal DNA. *Clin Chem* **55** 1559-1563.
- Belshaw NJ, Elliott GO, Williams EA, Bradburn DM, Mills SJ, Mathers JC & Johnson IT 2004 Use of DNA from human stools to detect aberrant CpG island methylation of genes implicated in colorectal cancer. *Cancer Epidemiol Biomarkers Prev* **13** 1495-1501.
- Chen WD, Han ZJ, Skoletsky J, Olson J, Sah J, Myeroff L, Platzer P, Lu S, Dawson D, Willis J, et al. 2005 Detection in fecal DNA of colon cancer-specific methylation of the nonexpressed vimentin gene. *J Natl Cancer Inst* **97** 1124-1132.
- Estecio MR, Yan PS, Ibrahim AE, Tellez CS, Shen L, Huang TH & Issa JP 2007 High-throughput methylation profiling by MCA coupled to CpG island microarray. *Genome Res* **17** 1529-1536.
- Glockner SC, Dhir M, Yi JM, McGarvey KE, Van Neste L, Louwagie J, Chan TA, Kleeberger W, de Bruine AP, Smits KM, et al. 2009 Methylation of TFPI2 in stool DNA: a potential novel biomarker for the detection of colorectal cancer. *Cancer Res* **69** 4691-4699.
- Hellebrekers DM, Lentjes MH, van den Bosch SM, Melotte V, Wouters KA, Daenen KL, Smits KM, Akiyama Y, Yuasa Y, Sanduleanu S, et al. 2009 GATA4 and GATA5 are potential tumor suppressors and biomarkers in colorectal cancer. *Clin Cancer Res* **15** 3990-3997.
- Kim MS, Louwagie J, Carvalho B, Terhaar Sive Droste JS, Park HL, Chae YK, Yamashita K, Liu J, Ostrow KL, Ling S, et al. 2009 Promoter DNA methylation of oncostatin m receptor-beta as a novel diagnostic and therapeutic marker in colon cancer. *PLoS One* **4** e6555.
- Lee BB, Lee EJ, Jung EH, Chun HK, Chang DK, Song SY, Park J & Kim DH 2009 Aberrant methylation of APC, MGMT, RASSF2A, and Wif-1 genes in plasma as a biomarker for early detection of colorectal cancer. *Clin Cancer Res* **15** 6185-6191.

- Lenhard K, Bommer GT, Asutay S, Schauer R, Brabletz T, Goke B, Lamerz R & Kolligs FT 2005 Analysis of promoter methylation in stool: a novel method for the detection of colorectal cancer. *Clin Gastroenterol Hepatol* **3** 142-149.
- Melotte V, Lentjes MH, van den Bosch SM, Hellebrekers DM, de Hoon JP, Wouters KA, Daenen KL, Partouns-Hendriks IE, Stessels F, Louwagie J, et al. 2009 N-Myc downstream-regulated gene 4 (NDRG4): a candidate tumor suppressor gene and potential biomarker for colorectal cancer. *J Natl Cancer Inst* **101** 916-927.
- Mori Y, Cai K, Cheng Y, Wang S, Paun B, Hamilton JP, Jin Z, Sato F, Berki AT, Kan T, et al. 2006 A genome-wide search identifies epigenetic silencing of somatostatin, tachykinin-1, and 5 other genes in colon cancer. *Gastroenterology* **131** 797-808.
- Muller HM, Oberwalder M, Fiegl H, Morandell M, Goebel G, Zitt M, Muhlthaler M, Ofner D, Margreiter R & Widschwendter M 2004 Methylation changes in faecal DNA: a marker for colorectal cancer screening? *Lancet* **363** 1283-1285.
- Nagasaka T, Tanaka N, Cullings HM, Sun DS, Sasamoto H, Uchida T, Koi M, Nishida N, Naomoto Y, Boland CR, et al. 2009 Analysis of fecal DNA methylation to detect gastrointestinal neoplasia. *J Natl Cancer Inst* **101** 1244-1258.
- Wettenhall JM & Smyth GK 2004 limmaGUI: a graphical user interface for linear modeling of microarray data. *Bioinformatics* **20** 3705-3706.
- Zou H, Harrington JJ, Shire AM, Rego RL, Wang L, Campbell ME, Oberg AL & Ahlquist DA 2007 Highly methylated genes in colorectal neoplasia: implications for screening. *Cancer Epidemiol Biomarkers Prev* **16** 2686-2696.
